# Supplementary material
Source: PubMed Central journal article supplement (PMC10217771)
Supplement: NIHMS1895317-supplement-Supplementary_Figures.pdf [file NIHMS1895317-supplement-Supplementary_Figures.pdf]

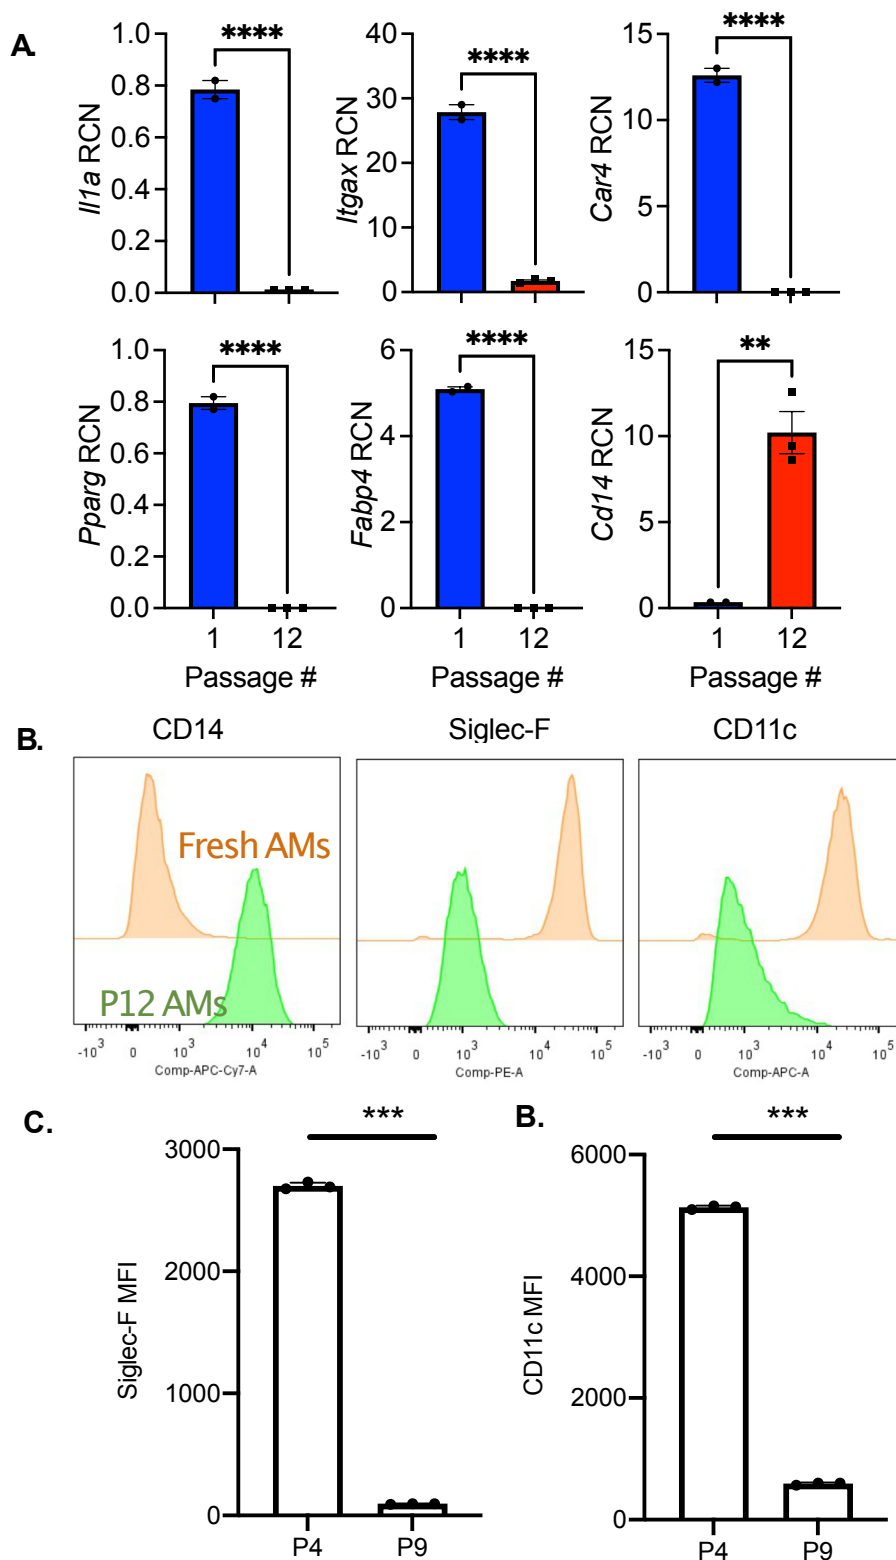

**Figure S1. Long term ex vivo culture of AMs leads to loss of AM-defining genes and surface markers.** Alveolar macrophages (AM) were isolated and cultured in RPMI with 20 ng/mL GM-CSF for approximately 2 months (12 passages). Gene expression (A) and cell surface markers (B) were compared between cultured AMs and freshly isolated AMs. Asterisks indicate significant differences (\*\*\*\* $p < 0.0001$ , \*\* $p < 0.01$ ) between samples. (C) Fetal liver macrophages were cultured for 1 week to allow for development and expression of Siglec-F and CD11c and were then stained and sorted based on Siglec-F expression with over 98% of cells expressing high levels of Siglec-F. Cells were then plated in media containing GM-CSF alone and at the indicated passage cells were lifted and stained for Siglec-F and CD11c. Asterisks indicated significant differences between samples (\*\*\* $p < 0.001$ ) as determined by a student's T-test. Results are representative of two independent experiments.

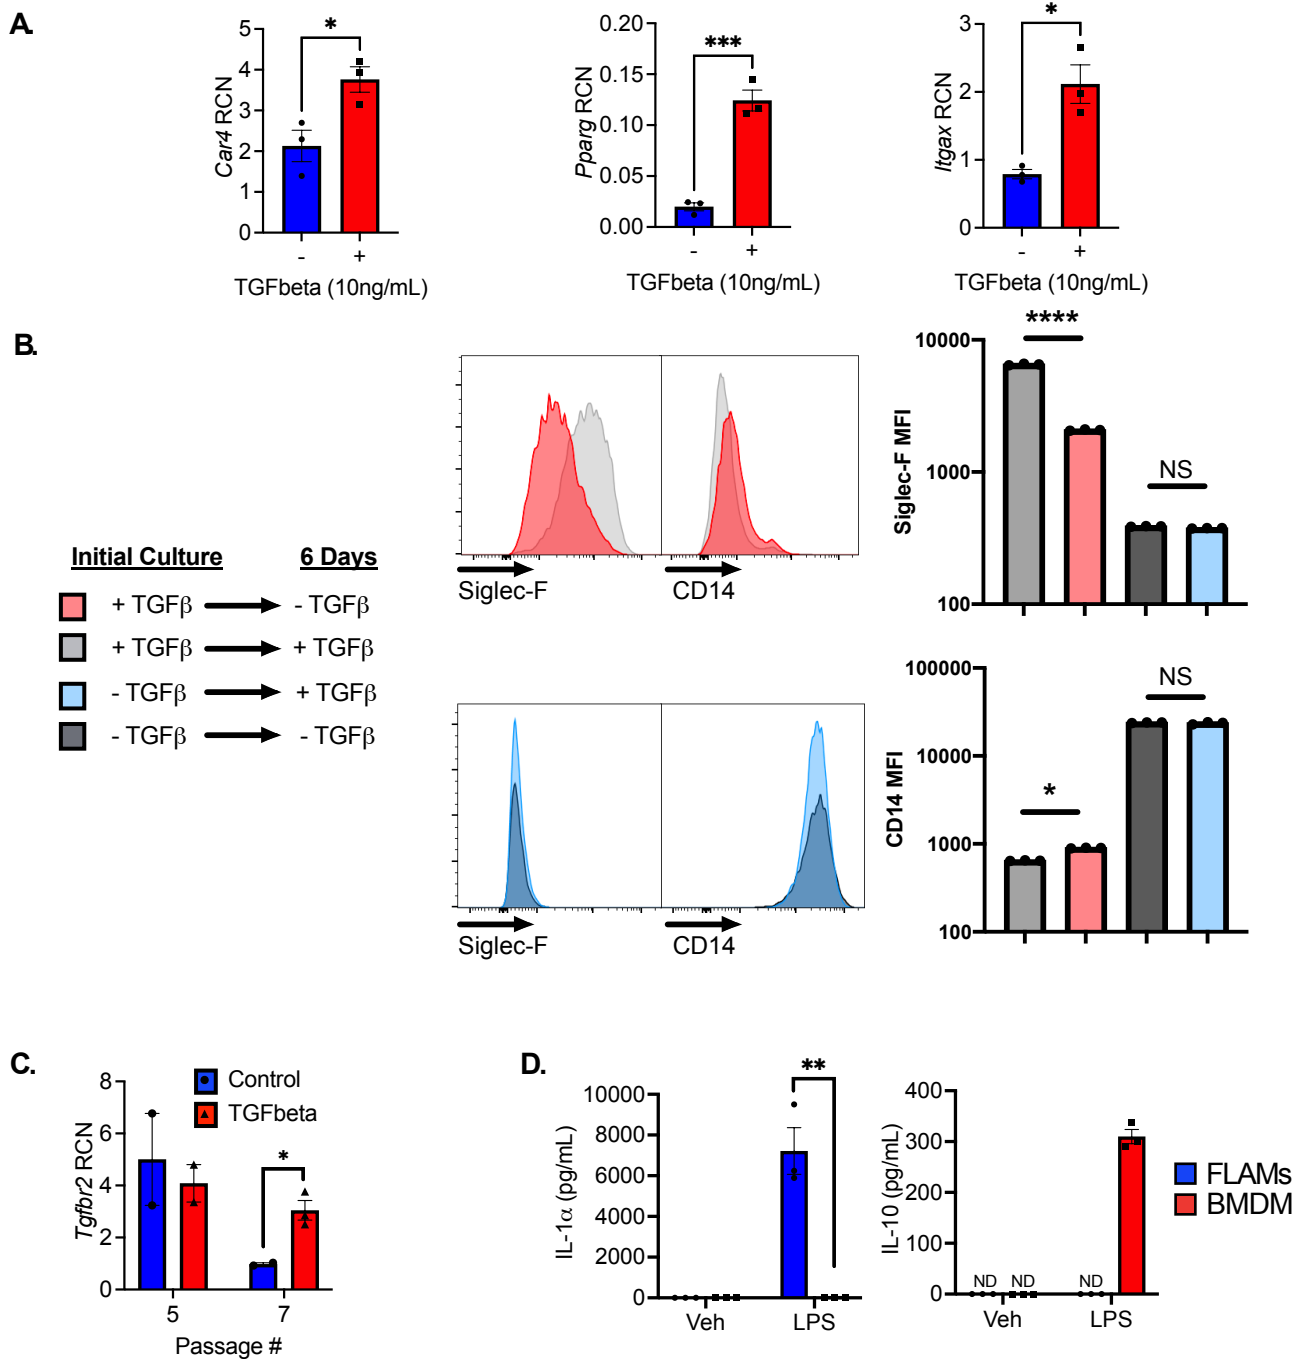

**Figure S2. TGF $\beta$  induces and maintains AM-like state in early-passage but not older fetal liver macrophages.** **A)** Freshly isolated fetal liver cells were incubated with 10 ng/mL TGF $\beta$  for 24 hours prior collecting RNA for qPCR analysis of *Car4*, *Itgax* and *Pparg* gene expression. **B)** Fetal liver macrophages that were low passage (<4) and kept in TGF $\beta$  and those that were high-passage (>15) and cultured without TGF $\beta$  were cultured for 6 days with and without TGF $\beta$ . On day 6, cells were lifted and surface expression of Siglec-F and CD14 was assessed by flow cytometry. **C)** Expression of *Tgfb2* in fetal liver macrophages cultured with and without TGF $\beta$  was assessed at P5 and P7. Asterisks indicate significant differences (\*\*\*\* $p$ <0.0001, \*\*\* $p$ <0.001, \* $p$ <0.05) between samples, as determined by Student's t-test. **(D)** Early fetal liver-derived cells and bone marrow-derived macrophages (BMDMs) were treated with 100 ng/mL LPS for 24 hours and cell-free supernatant was analyzed for release of IL-1 $\alpha$  and IL-10 by ELISA. Asterisks indicate significant differences (\*\* $p$ <0.01) between fetal liver macrophages cells and BMDMs. ND=not detected.
